# Supplementary material for: Design and Clinical Application of an Integrated Microfluidic Device for Circulating Tumor Cells Isolation and Single-Cell Analysis
Source: PubMed Central journal article supplement (PMC7824094; doi:10.3390/mi12010049), 2021-01-02
Supplement: micromachines-12-00049-s001.pdf [file micromachines-12-00049-s001.pdf]

# Supplementary Materials: Design and Clinical Application of an Integrated Microfluidic Device for Circulating Tumor Cells Isolation and Single-Cell Analysis

Mingxin Xu, Wenwen Liu, Kun Zou, Song Wei, Xinri Zhang, Encheng Li and Qi Wang

**Table S1.** Capture rate of the integrated device under different concentrations of PC-9 cells.

| PC-9 cell concentrations<br>(cells/mL) | Capture rate (%) of 3 independent tests |      |      | Average capture rate (%) |
|----------------------------------------|-----------------------------------------|------|------|--------------------------|
|                                        | 1                                       | 2    | 3    |                          |
| 10 <sup>1</sup>                        | 78.6                                    | 83.3 | 90.0 | 84.0                     |
| 10 <sup>2</sup>                        | 83.0                                    | 85.6 | 86.0 | 84.8                     |
| 10 <sup>3</sup>                        | 85.0                                    | 85.1 | 86.0 | 85.4                     |
| 10 <sup>4</sup>                        | 83.2                                    | 87.9 | 86.5 | 85.9                     |

Legend to Table S1. 10<sup>1</sup>–10<sup>4</sup> indicates the number of PC-9 cells spiked into healthy blood samples.

**Table S2.** Capture purity of the integrated device at a concentration of 10<sup>4</sup> cells/mL of PC-9 cells.

| PC-9 cell concentrations<br>(cells/mL) | Capture purity (%) of 3 independent tests |      |      | Average capture purity (%) |
|----------------------------------------|-------------------------------------------|------|------|----------------------------|
|                                        | 1                                         | 2    | 3    |                            |
| 10 <sup>1</sup>                        | 0.1                                       | 0.2  | 0.1  | 0.2                        |
| 10 <sup>2</sup>                        | 1.3                                       | 1.9  | 1.1  | 1.4                        |
| 10 <sup>3</sup>                        | 12.4                                      | 16.4 | 9.8  | 12.9                       |
| 10 <sup>4</sup>                        | 58.5                                      | 68.3 | 54.5 | 60.4                       |

Legend to Table S2. 10<sup>1</sup>–10<sup>4</sup> indicates the number of PC-9 cells spiked into healthy blood samples.

**Table S3.** Cell loss rate of the backwashing step under different concentrations of PC-9 cells.

| PC-9 cell concentrations<br>(cells/mL) | Cell loss rate (%) of 3 independent tests |      |      | Average cell loss rate (%) |
|----------------------------------------|-------------------------------------------|------|------|----------------------------|
|                                        | 1                                         | 2    | 3    |                            |
| 10 <sup>1</sup>                        | 14.3                                      | 11.1 | 10.0 | 11.8                       |
| 10 <sup>2</sup>                        | 10.4                                      | 12.8 | 9.0  | 10.7                       |
| 10 <sup>3</sup>                        | 10.4                                      | 9.6  | 9.2  | 9.7                        |
| 10 <sup>4</sup>                        | 6.2                                       | 7.5  | 8.1  | 7.3                        |

Legend to Table S3. 10<sup>1</sup>–10<sup>4</sup> indicates the number of PC-9 cells spiked into healthy blood samples.
